# Supplementary material
Source: Springer Nature journal article supplement (https://www.springermedizin.de/resource/supplementary/12959_2014_214_MOESM1_ESM.pdf/9569298)

Number of patients

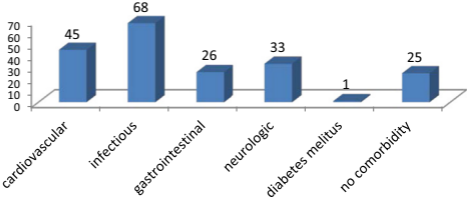

Types of co-morbid conditions

Supplement: MOESM1 [file 9569298]
